# Supplementary material for: Global 3-D distribution of aerosol composition by synergistic use of CALIOP and MODIS observations
Source: Copernicus journal article supplement (doi:10.5194/amt-2023-59), 2023-04-25
Supplement: Supplementary file 1 [file amt-2023-59-supplement-version1.pdf]

*Supplement of*

**Global 3-D distribution of aerosol composition by synergistic use of CALIOP and MODIS observations**

Rei Kudo et al.

5

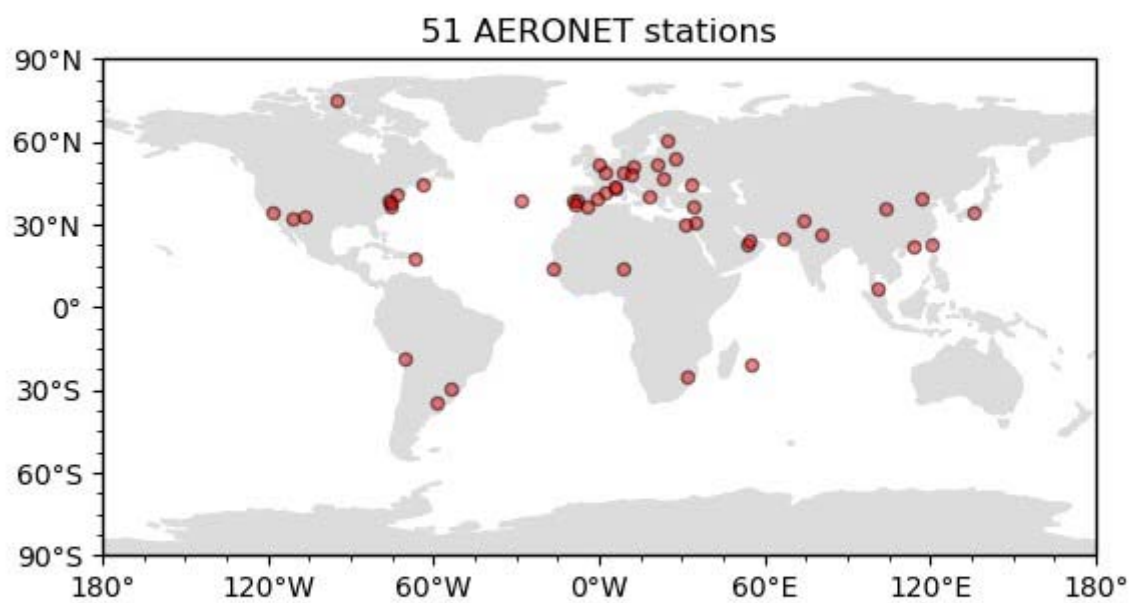

**Figure S1.** The AERONET stations used in the comparison of Sect. 5.2.

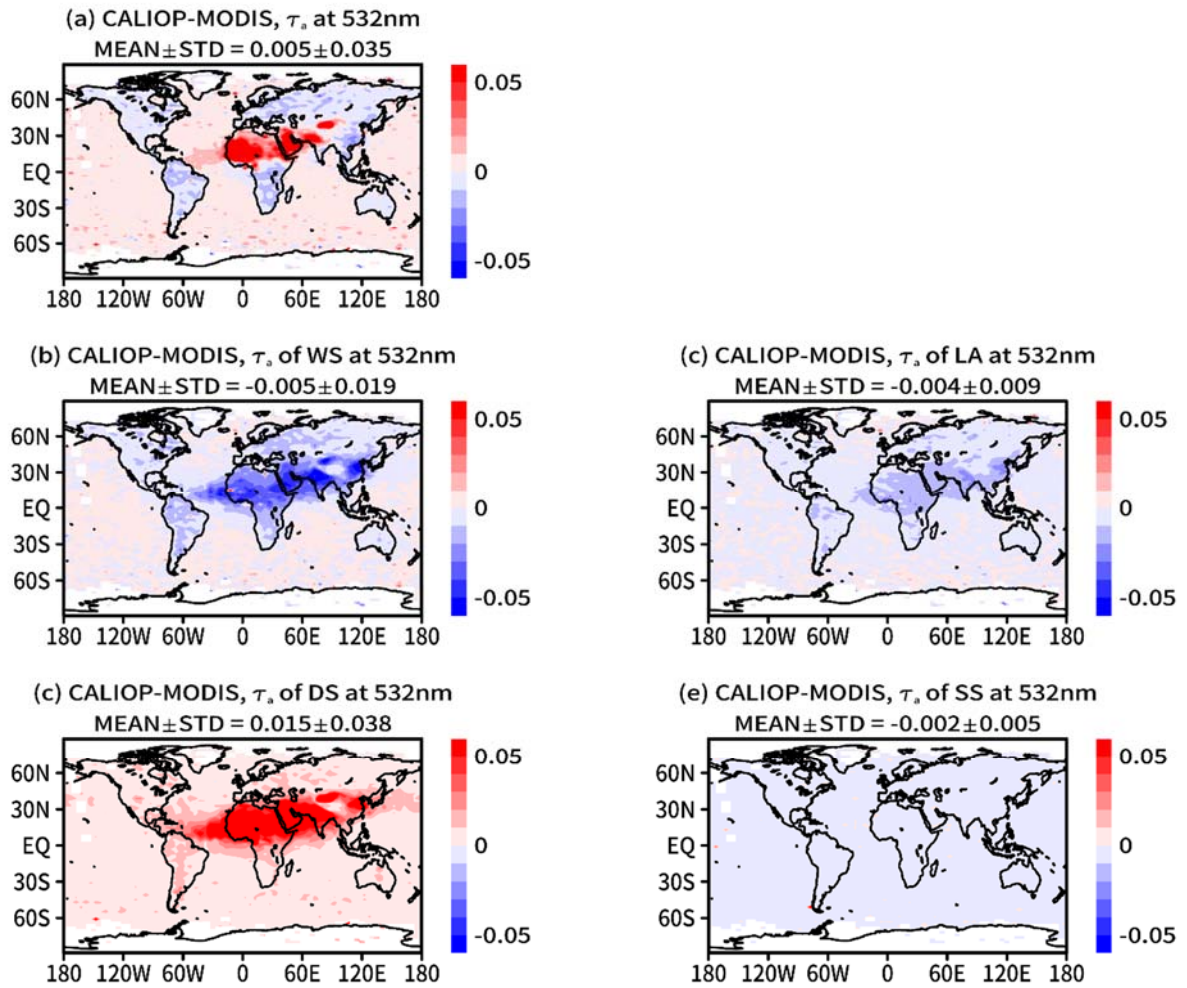

10 **Figure S2.** Horizontal distributions of the differences in the retrieved  $\tau_a$  of (a) total aerosols, (b) WS, (c) LA, (d) DS, and (e) SS between the retrievals with spheroid and Voronoi models. At the top of each panel, MEAN  $\pm$  STD indicates the global mean and its standard deviation.

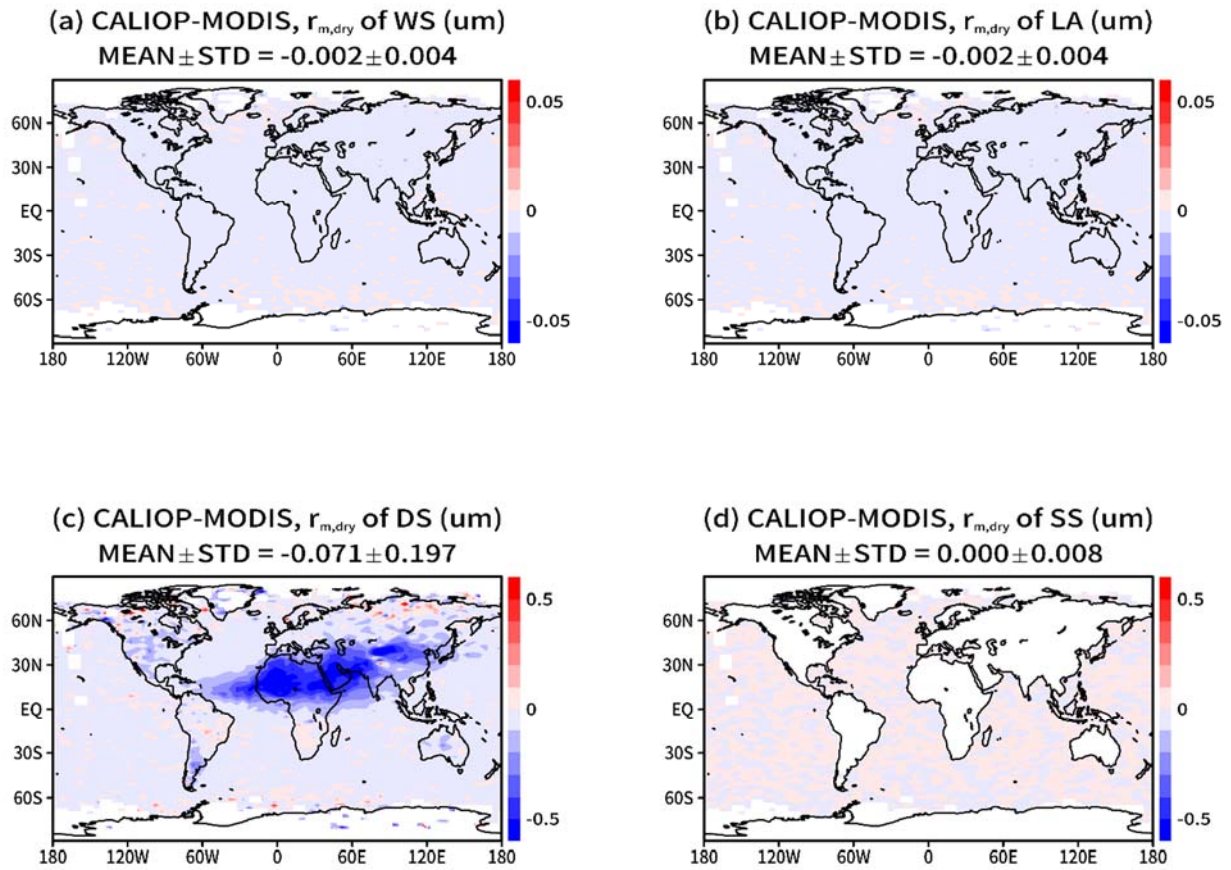

15 **Figure S3.** Horizontal distributions of the differences in the retrieved  $r_{m,dry}$  of (a) WS, (b) LA), (c) DS, and (d) SS between the retrievals with spheroid and Voronoi models. At the top of each panel,  $MEAN \pm STD$  indicates the global mean and its standard deviation.

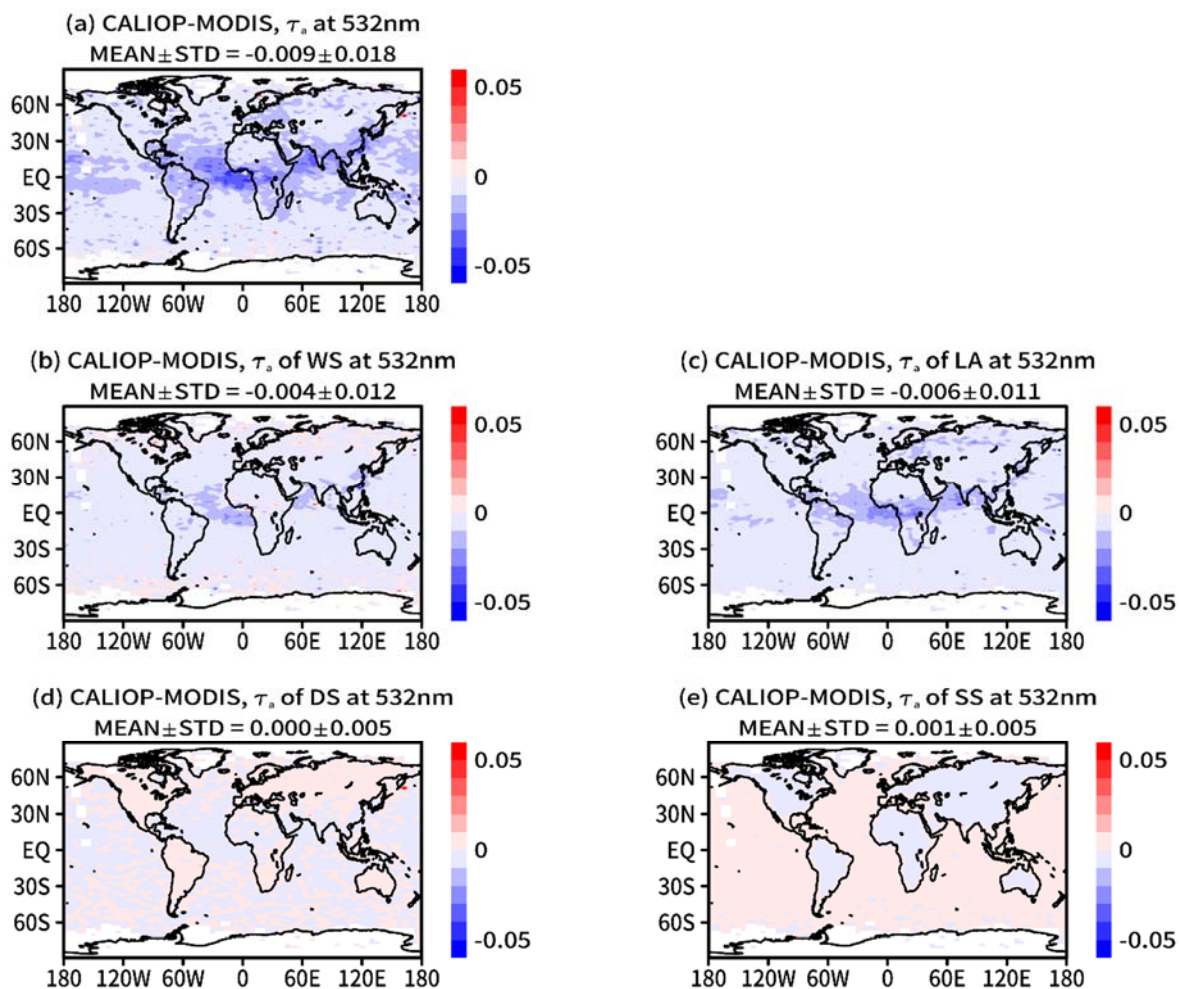

20 Figure S4. Horizontal distributions of differences in the retrieved  $\tau_a$  of (a) total aerosols, (b) WS, (c) LA, (d) DS, and (e) SS between the retrievals with BC volume fractions of 15 % and 30 %. At the top of each panel,  $\text{MEAN} \pm \text{STD}$  indicates the global mean and its standard deviation.
